# Supplementary material for: Spectroscopic real-time monitoring of NO 2 for city scale modelling
Source: Copernicus journal article supplement (doi:10.5194/amt-2017-30), 2017-03-31
Supplement: Supplementary file 1 [file amt-2017-30-supplement.pdf]

# Supplementary material to the article “Spectroscopic real-time monitoring of NO<sub>2</sub> for city scale modelling”

P. Morten Hundt<sup>1</sup>, Michael Müller<sup>1</sup>, Markus Mangold<sup>1,3</sup>, Béla Tuzson<sup>1</sup>, Philipp Scheidegger<sup>1</sup>, Herbert Looser<sup>1,2</sup>, Christoph Hüglin<sup>1</sup> and Lukas Emmenegger<sup>1</sup>

<sup>1</sup>Laboratory for Air Pollution and Environmental Technology, Empa, 8600 Dübendorf, Switzerland

<sup>2</sup>Institute for Aerosol and Sensor Technology, FHNW, 5210 Windisch, Switzerland

<sup>3</sup>Present address: IRsweep AG, 8093 Zürich, Switzerland

Correspondence to: P. Morten Hundt (Morten.Hundt@empa.ch)

## 1 Location of the AQM sites and tram services

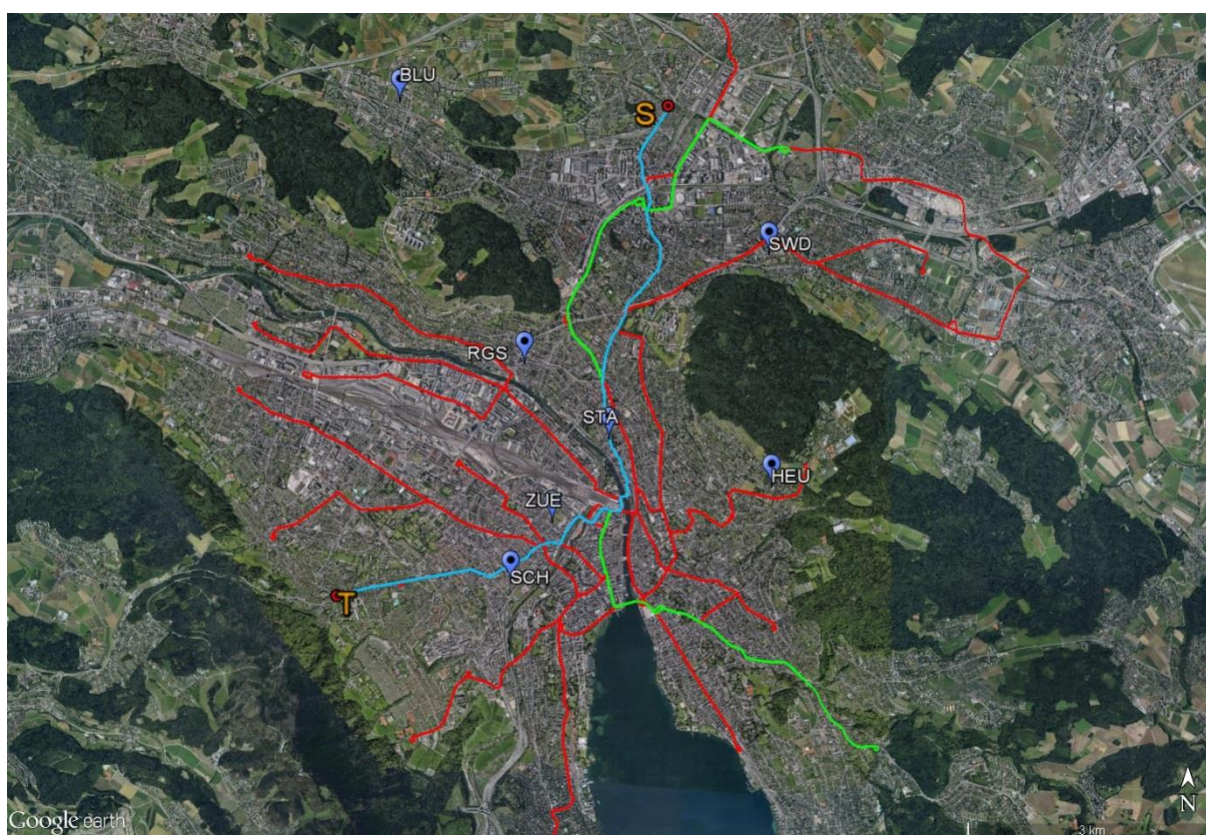

Figure 1: Location of the air quality monitoring (AQM) sites in Zurich (blue symbols). Site ZUE belongs to the National Monitoring Network for Air Pollution (Swiss Federal Office for the Environment). The other sites are operated by the Department for Environment and Health Protection of the City of Zurich. Site BLU is operational since 01 Jan 2016, site SWD was closed on 01 Feb 2016. The red lines depict the tram network of Zurich, the green line depicts the track of tram service no. 11 and the blue line depicts the track of tram service no. 14. The letters S and T depict the terminal stations “Seebach” and “Triemli”. The map was generated by using Google Earth.

## 2 Ozone concentrations

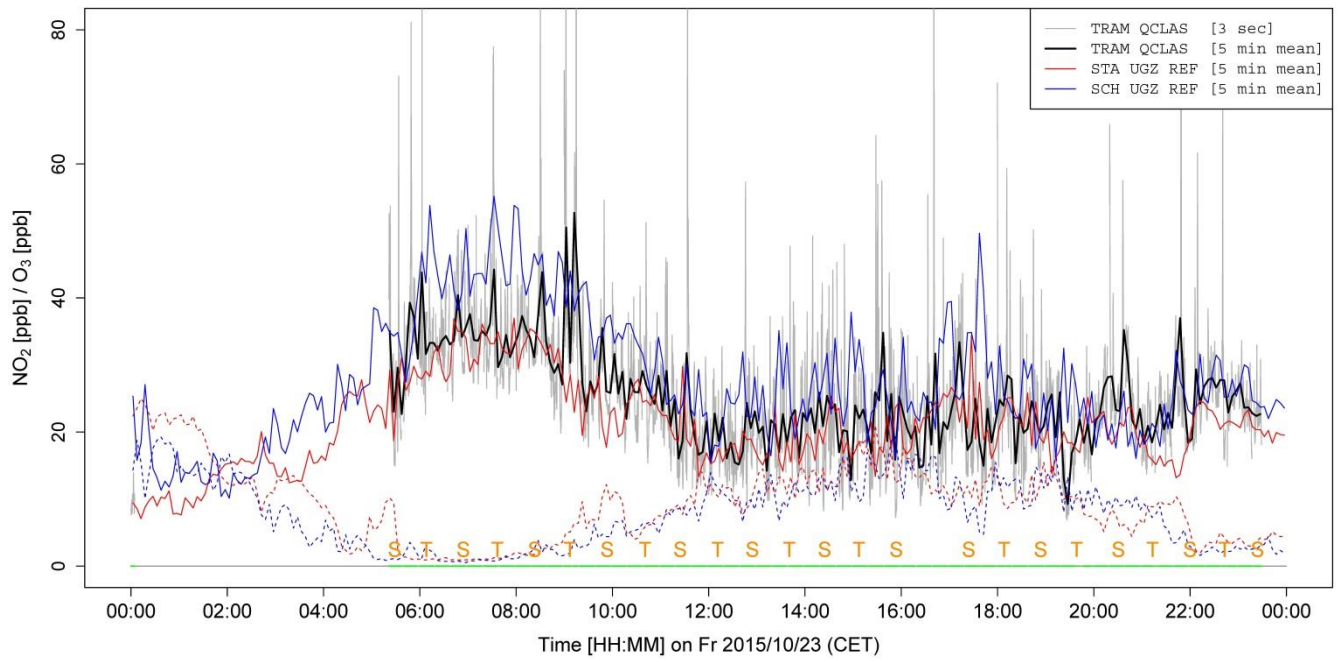

Figure 2: Example time series of measurements of the tram based QCLAS instrument like figure 6 in the main article. Additionally, the dotted lines depict the O<sub>3</sub> concentrations at the sites STA (red) and SCH (blue). Large parts of the traffic emissions are emitted as NO and not as NO<sub>2</sub>. Emitted NO is converted to NO<sub>2</sub> by ambient O<sub>3</sub>.
